# Supplementary material for: Immunosuppression reduces rAAV2.5T neutralizing antibodies that limit efficacy following repeat dosing to ferret lungs
Source: PubMed Central journal article supplement — Mol Ther Methods Clin Dev. 2023 Mar 2;29:70–80. doi: 10.1016/j.omtm.2023.02.015 (PMC10025970; doi:10.1016/j.omtm.2023.02.015), 2023-03-02
Supplement: mmc1.pdf [file mmc1.pdf]

**Supplemental information**

**Immunosuppression reduces rAAV2.5T  
neutralizing antibodies that limit efficacy  
following repeat dosing to ferret lungs**

**Yinghua Tang, Shahab Fakhari, Eric D. Huntemann, Zehua Feng, Peipei Wu, William Y. Feng, Junying Lei, Feng Yuan, Katherine J. Excoffon, Kai Wang, Maria P. Limberis, Roland Kolbeck, Ziyang Yan, and John F. Engelhardt**

**Table S1. Sequences of the primers-probes used in the TaqMan real-time PCR assay to detect cytokines in splenocytes**

| Cytokine           | Primer sequence (5' → 3')              | Reference gene accession #       |
|--------------------|----------------------------------------|----------------------------------|
| IL2-F              | CTACGAAGGAAGCACAGCAA                   | GenBank: EF368206                |
| IL2-Prb            | TGCTGCTGGACTTACAGTTGCTCT               |                                  |
| IL2-R              | GCCTTCTTGGGCATGTAGAA                   |                                  |
| IL4-F              | GTGCTTCAGCAGCTCTCTAC                   | GenBank: EF492062                |
| IL4-Prb            | TGCTCCAACAGATTGCTCAGAGGA               |                                  |
| IL4-R              | CAGGTCATGTTTGCCATGTTC                  |                                  |
| IL6-F              | CAAGTGGCTGAAACACGTAACAA                | GenBank: EF368209                |
| IL6-Prb            | TCACCTCATCCTACGGAGCCTTG                |                                  |
| IL6-R              | GGCTGAACTGCAGGAAATCC                   |                                  |
| IFN $\alpha$ -F    | GAAGACCTTCCACCTCTTCTG                  | GenBank: KJ831201                |
| IFN $\alpha$ -Prb  | CTCACCTGCTCCTTGGATCACGAC               |                                  |
| IFN $\alpha$ -R    | GAAATTCCCGAGCACAATTCC                  |                                  |
| IFN $\beta$ -F     | GGAGATCCAGAAATCCCAGAAG                 | GenBank: KJ831215                |
| IFN $\beta$ -Prb   | AGGAGGACATCGTATTGGTCACCCT              |                                  |
| IFN $\beta$ -R     | CTCATTCCATCCCGTGCTT                    |                                  |
| IFN $\gamma$ F     | TGGTGGGCCTCTTTTCTTAGATAT               | GenBank: KJB3124 <sup>1</sup>    |
| IFN $\gamma$ Prb   | TTGAAGAACTGGAGAGAGGAGAGTGAC<br>AAAAAAA |                                  |
| IFN $\gamma$ R     | AGAAGGAGACAATTTGGCTTTGA                |                                  |
| TNF $\alpha$ -F    | GCTGACAGACAACCAGCTAATA                 | Ensembl:<br>ENSMPUT00000011485.1 |
| TNF $\alpha$ -Prb  | ACGGGCTGTACCTTATCTACTCGCA              |                                  |
| TNF $\alpha$ -R    | GGAGCACATTGGTGAAGAA                    |                                  |
| $\beta$ -actin-F   | CGGGAAATCGTGCGTGATA                    | Ensembl:<br>ENSMPIUE00000175031  |
| $\beta$ -actin-Prb | AGCTGTGTTATGTGGCTCTGGACT               |                                  |
| $\beta$ -actin-R   | GGCAGCTCATAGCTCTTCTC                   |                                  |

F:forward primer; R:reverse primer; Prb:probe.

1. Carolan LA, Butler J, Rockman S, et al. TaqMan real time RT-PCR assays for detecting ferret innate and adaptive immune responses. *J Virol Methods*. 2014;205:38-52.
